# Supplementary material for: Cybercivility in Health Professions Education: A Qualitative Exploration of Perception and Experiences of Postgraduate Medical Students and Faculty
Source: Research Square preprint supplement (doi:10.21203/rs.3.rs-7321624/v1), 2025-09-30
Supplement: Supplementary file 1 [file 8e76a1d6e54fb4f1565d5616.docx]

**Appendix 2**

**Semi-structured interview guide for postgraduate students**

**Demographic and Participant Information:**

1. Age
2. Gender
3. Education
4. Current specialty
5. Year and institute of residency
6. Number of Social media accounts
7. Time spent (hours) using social media per day
8. Number of emails received per day
9. Number of text messages received per day

**Interview Questions:**

1**.** What does cybercivility in online spaces such as social media, emails, and online education mean to you as a postgraduate medical student? (Kim, Song, et al., 2020)

2. Which online behaviors or actions of faculty members would you consider uncivil? (De Gagne, Choi, et al., 2016)

3. How important do you believe it is to maintain civility in online interactions among medical professionals? (Kim, Lee, et al., 2020)

4. On which online platforms do you believe cyberincivility can occur? (De Gagne, Conklin, et al., 2018)

5. Have you personally experienced or observed instances of cyberincivility during your postgraduate training? (Kim, Song, et al., 2020)

6. Can you describe a specific incident of cyberincivility that stood out to you? How did it affect you or others involved? (De Gagne, Choi, et al., 2016)

7. How do you think experiencing or witnessing cyberincivility affects professional relationships, individual well-being, learning environment, and job satisfaction? (Kim, Song, et al., 2020)

8. What challenges do you face in addressing instances of cyberincivility within your postgraduate program? (De Gagne, Conklin, et al., 2018)

9. Are there any barriers to promoting a culture of cybercivility and fostering respectful online interactions among postgraduate students and faculty members? (De Gagne, Choi, et al., 2016)

10. Can you suggest any strategies or interventions that you believe could effectively promote cybercivility and mitigate cyberincivility within your postgraduate program? (De Gagne, Yamane, et al., 2016)

11. As a healthcare provider, what are your responsibilities for the posts or information (contents) that you share on the internet, if there are any? (De Gagne, Cho, et al., 2021)

12. How do you think students can contribute to creating a more positive online environment? (Plante & Asselin, 2014)

• Thank the participants for their insights and participation.

• Offer the opportunity to ask questions or provide additional comments.

• Confirm confidentiality and inform the resident about the next steps in the research process.
