# Supplementary material for: Cybercivility in Health Professions Education: A Qualitative Exploration of Perception and Experiences of Postgraduate Medical Students and Faculty
Source: Research Square preprint supplement (doi:10.21203/rs.3.rs-7321624/v1), 2025-09-30
Supplement: Supplementary file 2 [file c9e77504dd18c7dc2453065e.docx]

**Appendix 1**

**Semi-structured interview guide for faculty members**

**Demographic and Participant Information:**

1. Age

2. Gender

3. Education

4. Current position

5. Department and Institution

6. Number of Social media accounts

7. Time spent (hours) using social media per day

8. Number of emails received per day

9. Number of text messages received per day

**Interview Questions:**

1**.** What does cybercivility in online spaces such as social media, emails, and online education mean to you as a faculty member in medical education? (Kim, Song, et al., 2020)

2. Which online behaviors or actions of medical postgraduate residents would you consider uncivil? (De Gagne, Choi, et al., 2016)

3. How important do you believe it is to maintain civility in online interactions among medical professionals? (Kim, Lee, et al., 2020)

4. On which online platforms do you believe cyberincivility can occur? (De Gagne, Conklin, et al., 2018)

5. Have you personally experienced or observed instances of cyberincivility during your interactions with residents or colleagues? (Kim, Song, et al., 2020)

6. Can you describe a specific incident of cyberincivility that stood out to you? How did it affect you or others involved? (De Gagne, Choi, et al., 2016)

7. How do you think experiencing or witnessing cyberincivility affects professional relationships, individual well-being, learning environment, and job satisfaction? (Kim, Song, et al., 2020)

8. What challenges do you face in addressing instances of cyberincivility within your department or institution? (De Gagne, Conklin, et al., 2018)

9. Are there any barriers to promoting a culture of cybercivility and fostering respectful online interactions among residents and faculty members? (De Gagne, Choi, et al., 2016)

10. Can you suggest any strategies or interventions that you believe could effectively promote cybercivility and mitigate cyberincivility within your department or institution? (De Gagne, Yamane, et al., 2016)

11. As a healthcare provider, what are your responsibilities for the posts or information (contents) that you share on the internet, if there are any? (De Gagne, Cho, et al., 2021)

12. How do you think faculty members can contribute to creating a more positive online environment? (Plante & Asselin, 2014)

• Thank the faculty members for their insights and participation.

• Offer the opportunity to ask questions or provide additional comments.

• Confirm confidentiality and inform the participant about the next steps in the research process.
