# Supplementary material for: Cybercivility in Health Professions Education: A Qualitative Exploration of Perception and Experiences of Postgraduate Medical Students and Faculty
Source: Research Square preprint supplement (doi:10.21203/rs.3.rs-7321624/v1), 2025-09-30
Supplement: Supplementary file 3 [file f5d1f683f1700fc0c0089cc1.docx]

| **Appendix 3**  **Codes, sub-themes, and themes** | | | | |
| --- | --- | --- | --- | --- |
| **Sr. No.** | **CODE** | **F** | **SUB-THEME** | **THEME** |
| 1 | Respectful and ethical communication | 14 | **Professional and Ethical Behavior** | 1. **Professional Online Conduct** |
| 2 | Professionalism in online interactions | 13 |
| 3 | Conservatism in Medicine | 1 |
| 4 | Trust | 3 |
| 5 | Confidentiality and privacy management | 12 |
| 6 | Appropriate and purposeful content sharing | 8 |
| 7 | Avoidance of targeted harm | 2 |
| 8 | Equivalence of physical and online civility | 8 | **Civility in all settings** |
| 9 | Culture and Context | 2 |
| 10 | Cyberbullying and harassment | 2 | **Disrespect and Cyberbullying** | 1. **Manifestations of cyberincivility** |
| 11 | Cultural and contextual insensitivity | 1 |
| 12 | Lack of constructive engagement | 2 |
| 13 | Disrespect | 8 |
| 14 | Harsh criticism | 3 |
| 15 | Dismissive remarks | 2 |
| 16 | Gender bias | 1 |
| 17 | Public humiliation | 2 |
| 18 | Sharing of inappropriate content | 3 | **Lack of e-professionalism** |
| 19 | Confidentiality breach | 2 |
| 20 | Self-advertisement | 2 |
| 21 | Unprofessional and inappropriate behavior | 6 |
| 22 | Poor Communication practices | 8 |
| 23 | Rudeness and unpreparedness | 2 |
| 24 | Plagiarism | 2 |
| 25 | Social media misuse | 1 |
| 26 | Intrusion on personal time | 4 |
| 27 | Interpersonal conflicts and online grievances | 1 |
| 28 | Lack of active engagement | 1 |
| 29 | Widespread platform vulnerability | 16 | **Online Platforms susceptible to cyberincivility** |
| 30 | Communication platforms for professional and educational interactions | 5 |
| 31 | Social Media platforms | 8 |
| 32 | Frequent incivility | 9 |
| 33 | No observed or experienced cyberincivility | 2 |
| 34 | Trust and relationship deterioration | 2 | **Poor Personal and Professional Dynamics** | 1. **Negative Impact of Cyberincivility** |
| 35 | Disrupted learning | 8 |
| 36 | Job dissatisfaction | 1 |
| 37 | Embarrassment | 1 | **Emotional Consequences of cyberincivility** |
| 38 | Negative publicity | 1 |
| 39 | Emotional distress | 4 |
| 40 | Fear and anxiety | 2 |
| 41 | Engagement issues | 2 | **Psychological Strain** |
| 42 | Mental distress | 6 |
| 43 | Stress and burnout | 1 |
| 44 | Multi-level representation | 1 | **Deterioration of Public and Institutional Trust** |
| 45 | Public trust | 1 |
| 46 | Institutional reflection | 1 |
| 47 | Difficult to manage professional boundaries | 6 | **Blurring Of Personal and Professional Boundaries** | 1. **Barriers to Cybercivility** |
| 48 | Miscommunication | 2 | **Online Communication Challenges** |
| 49 | Misinterpretation | 1 |
| 50 | Confusion | 1 |
| 51 | Lack of institutional policies and training | 12 | **Institutional and Structural Barriers** |
| 52 | Institutional focus | 1 |
| 53 | Enforcement challenges | 2 |
| 54 | Institutional culture | 1 |
| 55 | Reluctance to report | 1 | **Power Dynamics** |
| 56 | Fairness | 1 |
| 57 | Support deficit | 3 |
| 58 | Fear of retaliation | 2 |
| 59 | Cultural and systemic challenges | 8 |
| 60 | Anonymity/E-curtain | 2 | **Online Environmental and Behavioral Constraints** |
| 61 | Established habits | 1 |
| 62 | Perception of separation | 1 |
| 63 | Impulsivity | 1 |
| 64 | Lack of awareness | 8 | **Ignorance and Digital Illiteracy** |
| 65 | Insufficient training | 7 |
| 66 | Inability to use digital platforms | 2 |
| 67 | Education and Awareness | 13 | **Educational Interventions and Professional Development** | 1. **Strategies For Promoting Cybercivility** |
| 68 | Training and mentorship | 8 |
| 69 | Workshops and faculty development programs | 2 |
| 70 | Institutional policies and authority | 8 | **Guidelines and Policies** |
| 71 | Establishing and enforcing guidelines | 2 |
| 72 | Anonymous reporting | 1 |
| 73 | Third-party interventions | 1 |
| 74 | Admin-controlled platforms | 1 |
| 75 | Self-regulation and purpose | 1 | **Personal Responsibility and Accountability** |
| 76 | Self-awareness | 1 |
| 77 | Role modeling | 5 | **Leading by Example** |
| 78 | Positive usage | 1 |
| 79 | Purposeful conduct | 1 |
| 80 | Avoidance of social media | 1 | **Intentional Disengagement** |
| 81 | Non-engagement | 2 |
| 82 | Non-responsiveness and inaction | 1 |
| 83 | Teamwork and patient care | 1 | **Creating a safe and collaborative environment** |
| 84 | Constructive feedback | 3 |
| 85 | Safety and privacy | 2 |
| 86 | Active engagement | 1 |
